# Supplementary material
Source: publisher site journal article supplement (https://www.dovepress.com/article/583466)
Supplement: Supplementary file 1 [file Supplementary%20Material_1.pdf]

## Supplementary Material 1

### Search strategy

#### Lateral Epicondylitis

1. Tennis Elbow [MeSH]
2. Elbow, Tennis
3. Tennis Elbows
4. Lateral Epicondylitis
5. Epicondylitis, Lateral
6. Epicondylitis, Lateral Humeral
7. Humeral Epicondylitis, Lateral
8. Lateral Humeral Epicondylitis
9. OR / 1-8

#### Acupuncture

10. acupuncture [MeSH]
11. acupuncture therapy [MeSH]
12. Acupuncture Treatment
13. Acupuncture Treatments
14. Treatment, Acupuncture
15. Therapy, Acupuncture
16. eletro-acupuncture
17. eletroacupuncture
18. manual acupuncture
19. needle
20. needling
21. warm needle
22. OR / 10-21

#### Combined search:

#9 AND #22

Legend: MeSH indicates Medical Subject Heading in Pubmed.

#### The search was limited to:

2015/1/1-2025/3/31[pdat]

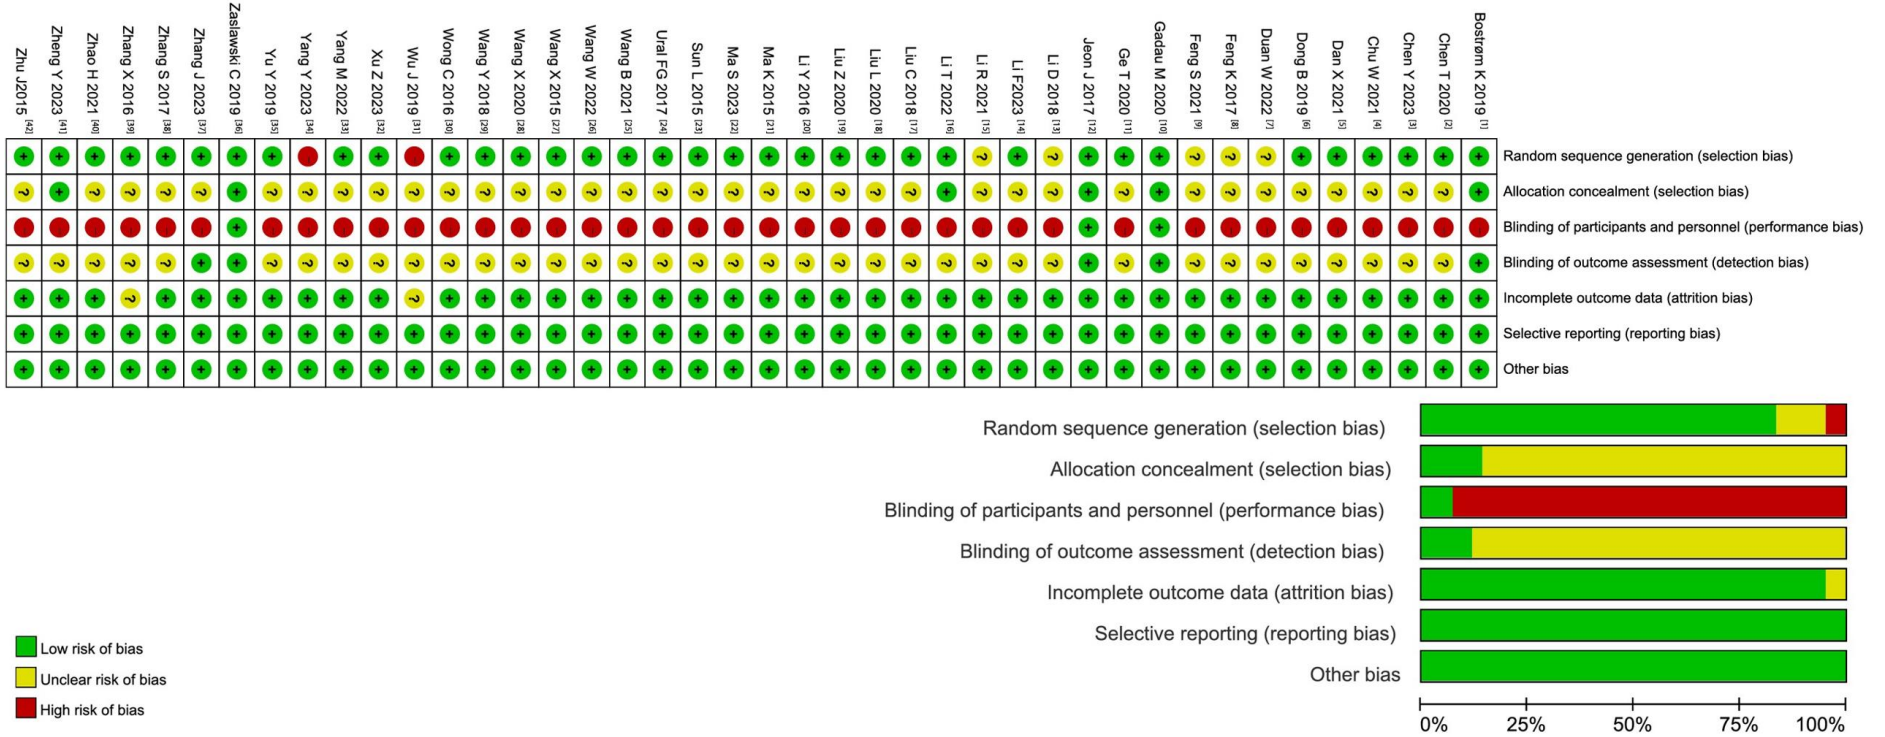

**Supplementary Material 2** Graphs of risk of bias. The upper graph illustrates the assessment for each risk of bias item across the included studies. The lower graph depicts the assessment of each domain across all included studies.

## Reference of included studies

- [1] Bostrøm K, Mæhlum S, Cvancarova Småstuen M, et al. Clinical comparative effectiveness of acupuncture versus manual therapy treatment of lateral epicondylitis: feasibility randomized clinical trial. *Pilot Feasibility Stud.* 2019;5:110.
- [2] Chen T, Gao Y. Clinical Observation of Meridian Acupoint Massage Combined with Surround Needling for External Humeral Epicondylitis. *Hubei Journal of TCM.* 2022;44(09):37-39.
- [3] Chen Y, Lu Q, Xiong Y. Acupuncture and Massage Combined with Western Medicine in the Conservative Treatment of Humeral Supracondylitis. *Chinese Medicine Modern Distance Education of China.* 2023;21(19):38-41.
- [4] Chu W, Wang H. Clinical Observation of Warm Needling Combined with Chinese Herbal Fumigation for External Humeral Epicondylitis. *Hubei Journal of TCM.* 2021;43(08):38-40.
- [5] Dan X, Zhang F, Yu L. Clinical Efficacy of Abdominal Acupuncture Combined with Local Warm Needling for External Humeral Epicondylitis. *Inner Mongolia Journal of Traditional Chinese Medicine.* 2021;40(08):145-146.
- [6] Dong B, Fu Y, Yang Z, et al. Clinical Efficacy of Abdominal Acupuncture Combined with Local Warm Needling for External Humeral Epicondylitis. *Jilin Journal of Chinese Medicine.* 2019;39(09):1233-1236.
- [7] Duan W, Wang L, Wang Q, et al. Observation on the Effect of Acupuncture Combined with Anti-inflammatory Injection for External Humeral Epicondylitis. *Chinese Science and Technology Journal Database (Abstract Edition): Medicine & Hygiene.* 2022;(5):3.
- [8] Feng K. Diclofenac Sodium Patch Combined with Warm Needling in the Treatment of External Humeral Epicondylitis: A Report of 30 Cases. *Inner Mongolia Journal of Traditional Chinese Medicine.* 2017;36(17):82-83.
- [9] Feng S, Lu W. Clinical Observation on the Treatment of Elbow Disorder of Hand Yangming Meridian with Dense-Sparse Wave Electroacupuncture Based on Meridian Differentiation. *Medical Frontiers.* 2021;11(36):173-175.
- [10] Gadau M, Zhang SP, Wang FC, et al. A multi-center international study of acupuncture for lateral elbow pain-Results of a randomized controlled trial. *Eur J Pain.* 2020;24(8):1458-1470.
- [11] Ge T, Zhang K, Shang Y, et al. Clinical Study of Surround Needling Combined with TCM Directional Drug Permeation for External Humeral Epicondylitis with Qi and Blood Deficiency Pattern. *Hebei Journal of Traditional Chinese Medicine.* 2020;42(09):1319-1322.
- [12] Jeon J, Bussin E, Scott A. Temporal divergence of changes in pain and pain-free grip strength after manual acupuncture or electroacupuncture: an experimental study in

people with lateral epicondylalgia. *Chin Med*. 2017;12(1):22.

[13] Li D. Efficacy Analysis of Warm Needling Therapy for External Humeral Epicondylitis with Wind-Cold Obstructing Collaterals Pattern. *Journal of Practical Traditional Chinese Medicine*. 2018;34(09):1115-1116.

[14] Li F, Fang H, Zheng H, et al. Clinical Study of Ultrasound-Guided Acupuncture Combined with Extracorporeal Shock Wave in Treatment of External Humeral Epicondylitis. *JCAM*. 2023;39(10):18-22.

[15] Li R, Lu Y. Clinical Study of Electroacupuncture Combined with Composite Manipulation for Tennis Elbow. *Journal of Practical Traditional Chinese Medicine*. 2021;37(07):1219-1220.

[16] Li T. Clinical Observation of Acupuncture Combined with Laser Irradiation for Tennis Elbow. *China's Naturopathy*. 2022;30(01):40-42.

[17] Liu C, Liu H, Wang Q. Observation on the Efficacy of Acupuncture Combined with Shock Wave Therapy for External Humeral Epicondylitis. *Journal of Practical Traditional Chinese Medicine*. 2018;34(08):982-983.

[18] Liu L, Zhuang C, Pan W, et al. Clinical Observation of Kinesio Taping Combined with Triple Needling for External Humeral Epicondylitis. *GuangMing Journal of Chinese Medicine*. 2020;35(14):2187-2190.

[19] Liu Z, Liu D, Li N. Clinical Study of Warm Needling Combined with Small Needle Knife for Refractory Tennis Elbow. *Guang Ming Journal of Chinese Medicine*. 2020;35(19):3064-3066.

[20] Li Y. Distal acupoints with Tui Na for treatment of humeral epicondylitis. *Shaanxi Journal of Traditional Chinese Medicine*. 2016;37(5):614-616.

[21] Ma K, Zhang B, Wang Y, et al. Observation on the efficacy of acupuncture combined with massage for sports tennis elbow. *Shaanxi Journal of Traditional Chinese Medicine*. 2015;36(11):1522-1523.

[22] Ma S, Dong B, Zeng M. Clinical observation on the treatment of external humerus epicondylitis by transfascial needle puncture combined with mobilization with movement. *Journal of Practical Traditional Chinese Medicine*. 2023;37(07):148-151.

[23] Sun L, Shi C. Observation on acupuncture combined with external application of refusan in the treatment of external humeral epicondylitis: a report of 38 cases. *Journal of Practical Traditional Chinese Medicine*. 2015;31(12):1110-1111.

[24] Ural FG, Öztürk GT, Bölük H, Akkuş S. Ultrasonographic Evaluation of Acupuncture Effect on Common Extensor Tendon Thickness in Patients with Lateral Epicondylitis: A Randomized Controlled Study. *J Altern Complement Med*. 2017;23(10):819-822.

[25] Wang B, Ren Y. Analysis of Warm Needling Combined with Small Needle Knife for Refractory Tennis Elbow. *Chinese Science and Technology Journal Database (Full-Text*

Edition): *Medicine & Hygiene*. 2021;(8):144-145.

[26] Wang W, Wang X, Huang J. Subcutaneous Acupuncture Combined with Exercise Therapy in the Treatment of External Humeral Epicondylitis: A Report of 30 Cases. *Fujian Journal of TCM*. 2022;53(02):58-59.

[27] Wang X, Wu Q, Wu S. Clinical Observation of Electrotherapy Combined with TDP Therapeutic Apparatus in Treatment of Tennis Elbow. *Journal of Hubei University of Chinese Medicine*. 2015;17(05):95-96.

[28] Wang X, Gao J. Clinical observation of fire needle combined with acupuncture in the treatment of extrahumeral epicondylitis. *Chinese Community Doctors*. 2020;36(30):102-103.

[29] Wang Y. Clinical Observation of Electroacupuncture for Refractory External Humeral Epicondylitis. *Asia-Pacific Traditional Medicine*. 2018;14(08):165-166.

[30] Wong C, Ng E, Fung P, et al. Comparison of treatment effects on lateral epicondylitis between acupuncture and extracorporeal shockwave therapy. *Asia Pac J Sports Med Arthrosc Rehabil Technol*. 2016;7:21-26.

[31] Wu J. Study on the Rehabilitation Efficacy of Acupuncture and Moxibustion for Tennis Elbow. *China Reflexology Journal*. 2019;28(02):123-124.

[32] Xu Z, Wu C, Zhang F, et al. Acupuncture at the First and the Last Acupoints in the Treatment of External Humeral Epicondylitis. *Chinese Medicine Modern Distance Education of China*. 2023;21(11):122-124.

[33] Yang M, Zhang X, Kou Z, et al. Clinical Analysis of "Simultaneous Treatment of Neck and Elbow" in the Treatment of Obstinate Lateral Epicondylitis of humerus. *Clinical Journal of Traditional Chinese Medicine*. 2022;34(12):2376-2379.

[34] Yang Y, Wang G, Zhang Z. Comparison of Clinical Effects between Local Massage and Warm Needling at Cervical Jiaji Points Combined with Massage for Refractory Tennis Elbow. *Inner Mongolia Journal of Traditional Chinese Medicine*. 2023;42(09):92-93.

[35] Yu Y, Lian J, Zhao M, et al. Treatment of Refractory Humeral Epicondylitis Based on Theory of "Sluggish Tendon and Fracturing Bone". *ACTA Chinese Medicine*. 2019;34(12):2678-2681.

[36] Zaslowski C, Gadau M, Zhang SP, et al. The effect of acupuncture on lateral elbow tendinopathy (LET): a multi-center international randomized controlled trial. *Advances in Integrative Medicine*. 2019;6:S52.

[37] Zhang J, Zhao C, Su G. Efficacy of Tongdu Zhitong Acupuncture Method Combined with Shangtong Plaster for External Humeral Epicondylitis and Its Effect on Serum Inflammatory Markers. *Hubei Journal of TCM*. 2023;45(05):56-59.

[38] Zhang S, He S, He Y. Clinical Observation on Acupuncture Combined with External

Application of Chinese Herbal Medicine in the Treatment of External Humeral Epicondylitis: A Report of 28 Cases. *China Health Care & Nutrition*. 2017;27(002):391.

[39] Zhang X. Observation on the Efficacy of Shujin Tongluo Acupuncture Method Combined with Local Block Therapy for External Humeral Epicondylitis. *GuangMing Journal of Chinese Medicine*. 2016;31(01):86-87.

[40] Zhao H, Shao C. Effects of Double-Needle Oblique Insertion at Ashi Points Combined with Muscle Energy Technique on Elbow Pain, Elbow Function, and Short-Term Prognosis for External Humeral Epicondylitis. *Mod J Integr Tradit Chin West Med*. 2021;30(31):3487-3491.

[41] Zheng Y, Tai J, Liu J. Analysis of Clinical Effect of Warm Needling Combined with Extracorporeal Shock Wave Therapy for External Humeral Epicondylitis. *Anhui Med Pharm J*. 2023;27(01):121-124.

[42] Zhu J. Observation on the Efficacy of Proximal Needling Combined with Pricking and Cupping for Tennis Elbow with Blood Stasis Obstructing Collaterals Pattern. *Medical Frontiers*. 2015;5(036):355-356.

**Supplementary Material 3** The 59 acupoint association rules for LE treatment

| LHS $\geq$ RHS                             | Support (%) | Confidence (%) | lift |
|--------------------------------------------|-------------|----------------|------|
| {LI10} $\geq$ {LI11}                       | 57.14       | 92.31          | 1.34 |
| {LI11} $\geq$ {LI10}                       | 57.14       | 82.76          | 1.34 |
| {Ashi point, LI10} $\geq$ {LI11}           | 40.48       | 94.44          | 1.37 |
| {Ashi point, LI11} $\geq$ {LI10}           | 40.48       | 80.95          | 1.31 |
| {TE5} $\geq$ {LI10}                        | 33.33       | 87.50          | 1.41 |
| {LI10, TE5} $\geq$ {LI11}                  | 30.95       | 92.86          | 1.34 |
| {LU5} $\geq$ {LI11}                        | 30.95       | 86.67          | 1.26 |
| {TE5} $\geq$ {LI11}                        | 30.95       | 81.25          | 1.18 |
| {LI11, TE5} $\geq$ {LI10}                  | 30.95       | 100.00         | 1.62 |
| {LU5} $\geq$ {LI10}                        | 28.57       | 80.00          | 1.29 |
| {LI10, LU5} $\geq$ {LI11}                  | 26.19       | 91.67          | 1.33 |
| {LI10, LI4} $\geq$ {LI11}                  | 26.19       | 91.67          | 1.33 |
| {LI11, LU5} $\geq$ {LI10}                  | 26.19       | 84.62          | 1.37 |
| {Ashi point, LI10, TE5} $\geq$ {LI11}      | 23.81       | 100.00         | 1.45 |
| {Ashi point, LU5} $\geq$ {LI11}            | 23.81       | 90.91          | 1.32 |
| {Ashi point, TE5} $\geq$ {LI11}            | 23.81       | 83.33          | 1.21 |
| {Ashi point, LI11, TE5} $\geq$ {LI10}      | 23.81       | 100.00         | 1.62 |
| {Ashi point, TE5} $\geq$ {LI10}            | 23.81       | 83.33          | 1.35 |
| {LI4, TE5} $\geq$ {LI10}                   | 21.43       | 90.00          | 1.45 |
| {Ashi point, LI10, LU5} $\geq$ {LI11}      | 19.05       | 100.00         | 1.45 |
| {Ashi point, LI10, LI4} $\geq$ {LI11}      | 19.05       | 100.00         | 1.45 |
| {LI10, LI4, TE5} $\geq$ {LI11}             | 19.05       | 88.89          | 1.29 |
| {LI12} $\geq$ {LI11}                       | 19.05       | 80.00          | 1.16 |
| {LI4, TE5} $\geq$ {LI11}                   | 19.05       | 80.00          | 1.16 |
| {LI11, LI4, TE5} $\geq$ {LI10}             | 19.05       | 100.00         | 1.62 |
| {LU5, TE5} $\geq$ {LI10}                   | 19.05       | 88.89          | 1.44 |
| {Ashi point, LI11, LU5} $\geq$ {LI10}      | 19.05       | 80.00          | 1.29 |
| {Ashi point, LI11, LI4} $\geq$ {LI10}      | 19.05       | 80.00          | 1.29 |
| {LI12} $\geq$ {Ashi point}                 | 19.05       | 80.00          | 1.08 |
| {Ashi point, LI12} $\geq$ {LI11}           | 16.67       | 87.50          | 1.27 |
| {LI4, LU5} $\geq$ {LI11}                   | 16.67       | 87.50          | 1.27 |
| {LI10, LU5, TE5} $\geq$ {LI11}             | 16.67       | 87.50          | 1.27 |
| {LI11, LU5, TE5} $\geq$ {LI10}             | 16.67       | 100.00         | 1.62 |
| {LI4, LU5} $\geq$ {LI10}                   | 16.67       | 87.50          | 1.41 |
| {LI11, LI12} $\geq$ {Ashi point}           | 16.67       | 87.50          | 1.19 |
| {LI10, LI4, LU5} $\geq$ {TE5}              | 14.29       | 85.71          | 2.25 |
| {Ashi point, LI4, LU5} $\geq$ {LI11}       | 14.29       | 100.00         | 1.45 |
| {Ashi point, LI10, LU5, TE5} $\geq$ {LI11} | 14.29       | 100.00         | 1.45 |
| {Ashi point, LU5, TE5} $\geq$ {LI11}       | 14.29       | 85.71          | 1.24 |

|                                            |       |        |      |
|--------------------------------------------|-------|--------|------|
| {LI10, LI4, LU5} $\geq$ {LI11}             | 14.29 | 85.71  | 1.24 |
| {LI4, LU5, TE5} $\geq$ {LI10}              | 14.29 | 100.00 | 1.62 |
| {Ashi point, LI11, LU5, TE5} $\geq$ {LI10} | 14.29 | 100.00 | 1.62 |
| {Ashi point, LU5, TE5} $\geq$ {LI10}       | 14.29 | 85.71  | 1.38 |
| {LI11, LI4, LU5} $\geq$ {LI10}             | 14.29 | 85.71  | 1.38 |
| {LI11, LU5, TE5} $\geq$ {Ashi point}       | 14.29 | 85.71  | 1.16 |
| {LI11, LI4, LU5} $\geq$ {Ashi point}       | 14.29 | 85.71  | 1.16 |
| {LI10, LI11, LU5, TE5} $\geq$ {Ashi point} | 14.29 | 85.71  | 1.16 |
| {LI10, LI11, LI4, LU5} $\geq$ {TE5}        | 11.90 | 83.33  | 2.19 |
| {Ashi point, LI10, LI4, LU5} $\geq$ {LI11} | 11.90 | 100.00 | 1.45 |
| {Ashi point, LI10, LI4, TE5} $\geq$ {LI11} | 11.90 | 100.00 | 1.45 |
| {LI4, LU5, TE5} $\geq$ {LI11}              | 11.90 | 83.33  | 1.21 |
| {Ashi point, LI4, TE5} $\geq$ {LI11}       | 11.90 | 83.33  | 1.21 |
| {LI10, LI4, LU5, TE5} $\geq$ {LI11}        | 11.90 | 83.33  | 1.21 |
| {LI11, LI4, LU5, TE5} $\geq$ {LI10}        | 11.90 | 100.00 | 1.62 |
| {Ashi point, LI11, LI4, TE5} $\geq$ {LI10} | 11.90 | 100.00 | 1.62 |
| {Ashi point, LI4, LU5} $\geq$ {LI10}       | 11.90 | 83.33  | 1.35 |
| {Ashi point, LI4, TE5} $\geq$ {LI10}       | 11.90 | 83.33  | 1.35 |
| {Ashi point, LI11, LI4, LU5} $\geq$ {LI10} | 11.90 | 83.33  | 1.35 |
| {LI10, LI11, LI4, LU5} $\geq$ {Ashi point} | 11.90 | 83.33  | 1.13 |
